# Supplementary material
Source: PubMed Central journal article supplement (PMC3787709)
Supplement: NIHMS517699-supplement-Weblink_references.pdf [file NIHMS517699-supplement-Weblink_references.pdf]

## WEBLINK REFERENCES

- W1. **Pillay A**, Radebe F, Fehler G, et al. Comparison of a TaqMan-based real-time polymerase chain reaction with conventional tests for the detection of *Trichomonas vaginalis*. *Sex Transm Infect*, 2007;83:126-9.
- W2. **Hardick A**, Hardick J, Wood BJ, et al. Comparison between the Gen-Probe transcription-mediated amplification *Trichomonas vaginalis* research assay and real-time PCR for *Trichomonas vaginalis* detection using a Roche LightCycler instrument with female self-obtained vaginal swab samples and male urine samples. *J Clin Microbiol*, 2006;44:4197-9.
- W3. **Caliendo A**, Jordan J, Green A, et al. Real-time PCR improves detection of *Trichomonas vaginalis* infection compared with culture using self-collected vaginal swabs. *Infect Dis Obstet Gynecol*, 2005;13:145-50.
- W4. **Van Der Pol B**, Kraft CS, Williams JA. Use of an adaptation of a commercially available PCR assay aimed at diagnosis of chlamydia and gonorrhea to detect *Trichomonas vaginalis* in urogenital specimens. *J Clin Microbiol*, 2006;44:366-73.
- W5. **Madico G**, Quinn TC, Rompalo A, et al. Diagnosis of *Trichomonas vaginalis* infection by PCR using vaginal swab samples. *J Clin Microbiol*, 1998;36:3205-10.
- W6. **Kaydos SC**, Swygard H, Wise SL, et al. Development and validation of a PCR-based enzyme-linked immunosorbent assay with urine for use in clinical research settings to detect *Trichomonas vaginalis* in women. *J Clin Microbiol*, 2002;40:89-95.
- W7. **Hardick J**, Yang S, Lin S, et al. Use of the Roche LightCycler instrument in a real-time PCR for *Trichomonas vaginalis* in urine samples from females and males. *J Clin Microbiol*, 2003;41:5619-5622.

- W8. **Rompalo AM**, Gaydos CA, Shah N, et al. Evaluation of use of a single intravaginal swab to detect multiple sexually transmitted infections in active-duty military women. *Clin Infect Dis*, 2001;33:1455-61.
- W9. **Lippman SA**, Jones HE, Luppi CG, et al. Home-based self-sampling and self-testing for sexually transmitted infections: acceptable and feasible alternatives to provider-based screening in low-income women in Sao Paulo, Brazil. *Sex Transm Dis*, 2007;34:421-8.
- W10. **Owens SL**, Arora N, Quinn N, et al. Utilising the internet to test for sexually transmitted infections: results of a survey and accuracy testing. *Sex Transm Infect*, 2010;86:112-6.
- W11. **Chai SJ**, Aumakhan B, Barnes M, et al. Internet-based screening for sexually transmitted infections to reach nonclinic populations in the community: risk factors for infection in men. *Sex Transm Dis*, 2010;37:756-63.
- W12. **Swygard H**, Miller WC, Kaydos-Daniels SC, et al. Targeted screening for *Trichomonas vaginalis* with culture using a two-step method in women presenting for STD evaluation. *Sex Transm Dis*, 2004;31:659-64.
